# Supplementary material
Source: PubMed Central journal article supplement (PMC2725596)
Supplement: supp_191_16_5085__1.pdf [file supp_191_16_5085__1.pdf]

## Supplementary Table 1: Primer used in this study

### In-frame deletions

|                  |                                          |
|------------------|------------------------------------------|
| FliF-I-fw-SacI   | GCAGAGCTCATCATTAAGTCTAAGCGAGTGTTTTTC     |
| FliF-I-rv-PstI   | CGTGCTGCAGTGGTTACAAGACAATGGCTGAG         |
| FliF-II-fw-PstI  | GTTCTGCAGTACGCCGATTTATGTTCTTGCTGG        |
| FliF-II-rv-NcoI  | GAGTTCCATGGTCAATAACTCGACGATGAGGAG        |
| FliF-check-fw    | AATGCCAAGGCAGCCGTAAG                     |
| FliF-check-rv    | CCACCTTGACCTGCGAATTG                     |
| MotX-I-fw-AgeI   | CTATACCGGTCCAGACCGTAACGAGACGATGATTTTAGT  |
| MotX-I-rv-EcoRI  | CACGAATTCTGCACGCGCTTCAATATCTTGTACTAATTG  |
| MotX-II-fw-EcoRI | AATGAATTCACCGATGAGGCGACGAAGAAAAAAGCCTTA  |
| MotX-II-rv-NcoI  | CTACCATGGTTTTAGGTAAGCCGTAGCTTTGACCGCGGGT |
| MotX-check-fw    | GAAGGTTATGAGCAGGTCACTCCTGTTTATG          |
| MotX-check-rv    | CATTCCGACCTTCTGCGCCAATACTTTATC           |
| MotY-I-fw-SacI   | CTTGAGCTCACAGCGTTCGATAGCTTTACTGAC        |
| MotY-I-rv-PstI   | TAACTGCAGTTTTTCGCCACATAGCCCTTACTC        |
| MotY-II-fw-PstI  | GTCCTGCAGAGCAAACCGCTCTAAATCAAACC         |
| MotY-II-rv-NcoI  | GTTCCATGGGATGAAGCTATCATGGGTCTGAG         |
| MotY-check-fw    | TCCAGCCAAAGTTGCAGTATC                    |
| MotY-check-rv    | TTTGTTTGCCTGATCTGCTG                     |

### Amplification and cloning of *motY* for sequencing

|                |                                          |
|----------------|------------------------------------------|
| seqMotY-fw-Bam | CTAGGATCCGTCATGTTTGATTGCTGGTTTTATGCG TTC |
| seqMotY-rv-Xho | AGCCTCGAGAAAAGACAATGCCAAGTCAACAGACTT     |
| M13R           | CAGGAAACAGCTATGAC                        |
| M13F           | GTAAAACGACGGCCAG                         |

### Cloning *motX* and *motY* for complementation

|                 |                                |
|-----------------|--------------------------------|
| motX-fw-BamHI   | TGGATCCGAGTCAACTTTCGGTGCGACC   |
| motX-rv-EcoRI   | CGAATTCTCAACGGTTCGCAAGTGCTC    |
| motY-fw-BamHI   | TGGATCCCGCATCGGTTTGAGAGTTGAAGC |
| motY-rv-(EcoRI) | GGTTTAGTCATCAGACCTACAGAGC      |

### Amplification of internal fragments for probing *motX* and *motY* in Southern analysis

|           |                                |
|-----------|--------------------------------|
| motX-I-fw | AAGTCTTAAAACAGCCCCTATATCAG     |
| motX-I-rv | AATACATTGTTATATAACCAGTTATAGGCC |
| motY-I-fw | ATTTTATGCGTTCAGCAACTGC         |
| motY-I-rv | ATTCGGACAACAACCCTGCGG          |

**Construction of pJP5603-mCherry, pJP5603::motX-mCherry, pJP5603::motY-mCherry**

|                  |                                                   |
|------------------|---------------------------------------------------|
| mCherry-fw-BamHI | AAAGGATCCGGAGGAGGCGTTTCCAAAGGGGAAGAGG<br>ACAATATG |
| mCherry-rv-SalI  | GCAGTCGACTTATTTGTATAACTCATCCATAC                  |
| motX-C-fw-EcoRI  | TTGGAATTCGTCAAACAGGATGAGTGCCAATTAG                |
| motX-C-rv-BamHI  | GACGGATCCACGGGTTTCGCAAGTGCTC                      |
| motY-C-fw-EcoRI  | GATTGAATTCAGCTTGGTCAATGCTAAACGAG                  |
| motY-C-rv-BamHI  | GTTTGGATCCGAGCGGTTTGCTAATTCGGAC                   |
